# Supplementary material
Source: Elsevier journal article supplement (https://www.sciencedirect.com/science/article/pii/S000173101830262X)
Supplement: mmc1 [file S000173101830262X:mmc1.pdf]

## Apéndice A (Material Suplementario)

El Brief COPE consta de las siguientes subescalas:

1. Afrontamiento activo: Iniciar acciones directas, incrementar los propios esfuerzos eliminar o reducir al estresor.
2. Planificación: Pensar acerca de cómo afrontar al estresor. Planificar estrategias de acción, los pasos a dar y la dirección de los esfuerzos a realizar.
3. Apoyo instrumental: Procurar ayuda, consejo, información a personas que son competentes acerca de lo que debe hacer.
4. Uso de apoyo emocional: Conseguir apoyo emocional de simpatía y de comprensión.
5. Auto-distracción: Concentrarse en otros proyectos, intentando distraerse con otras actividades, para tratar de no concentrarse en el estresor.
6. Desahogo: Aumento de la conciencia del propio malestar emocional, acompañado de una tendencia a expresar o descargar esos sentimientos.
7. Desconexión conductual: Reducir los esfuerzos para tratar con el estresor, incluso renunciando al esfuerzo para lograr las metas con las cuales se interfiere al estresor.
8. Reinterpretación positiva: Buscar el lado positivo y favorable del problema e intentar mejorar o crecer a partir de la situación.
9. Negación: Negar la realidad del suceso estresante.
10. Aceptación: Aceptar el hecho de lo que está ocurriendo, de que es real.
11. Religión: La tendencia a volver hacia la religión en momentos de estrés, aumentar la participación en actividades religiosas.
12. Uso de sustancias (alcohol, medicamentos): Significa tomar alcohol u otras sustancias con el fin sentirse bien o para ayudarse a soportar al estresor.

### Cuestionario COPE -28

**Instrucciones:** Las frases que aparecen a continuación describen formas de pensar, sentir o comportarse, que la gente suele utilizar para enfrentarse a los problemas personales o situaciones difíciles que en la vida causan tensión o estrés. Las formas de enfrentarse a los problemas, como las que aquí se describen, no son ni buenas ni malas, ni tampoco unas son mejores o peores que otras. Simplemente, ciertas personas utilizan más unas formas que otras. Ponga 0, 1, 2 ó 3 en el espacio dejado al principio, es decir, el número que mejor refleje su propia forma de enfrentarse al problema.

1. \_\_\_\_ Intento conseguir que alguien me ayude o aconseje sobre qué hacer.
2. \_\_\_\_ Concentro mis esfuerzos en hacer algo sobre la situación en la que estoy.
3. \_\_\_\_ Acepto la realidad de lo que ha sucedido.
4. \_\_\_\_ Recorro al trabajo o a otras actividades para apartar las cosas de mi mente.
5. \_\_\_\_ Me digo a mí mismo “esto no es real”.
6. \_\_\_\_ Intento proponer una estrategia sobre qué hacer.
7. \_\_\_\_ Hago bromas sobre ello.
8. \_\_\_\_ Me critico a mí mismo.
9. \_\_\_\_ Consigo apoyo emocional de otros.
10. \_\_\_\_ Tomo medidas para intentar que la situación mejore.
11. \_\_\_\_ Renuncio a intentar ocuparme de ello.
12. \_\_\_\_ Digo cosas para dar rienda suelta a mis sentimientos desagradables.
13. \_\_\_\_ Me niego a creer que haya sucedido.
14. \_\_\_\_ Intento verlo con otros ojos, para hacer que parezca más positivo.
15. \_\_\_\_ Utilizo alcohol u otras drogas para hacerme sentir mejor.
16. \_\_\_\_ Intento hallar consuelo en mi religión o creencias espirituales.
17. \_\_\_\_ Consigo el consuelo y la comprensión de alguien.

18. \_\_\_\_ Busco algo bueno en lo que está sucediendo.
19. \_\_\_\_ Me río de la situación.
20. \_\_\_\_ Rezo o medito.
21. \_\_\_\_ Aprendo a vivir con ello.
22. \_\_\_\_ Hago algo para pensar menos en ello, tal como ir al cine o ver la televisión.
23. \_\_\_\_ Expreso mis sentimientos negativos.
24. \_\_\_\_ Utilizo alcohol u otras drogas para ayudarme a superarlo.
25. \_\_\_\_ Renuncio al intento de hacer frente al problema.
26. \_\_\_\_ Pienso detenidamente sobre los pasos a seguir.
27. \_\_\_\_ Me echo la culpa de lo que ha sucedido.
28. \_\_\_\_ Consigo que otras personas me ayuden o aconsejen.

**Interpretación:**

Trasladar cada una de las puntuaciones de las dimensiones para obtener la puntuación directa (entre 0 y 6). A mayor puntuación, mayor empleo de esa estrategia de afrontamiento.

Afrontamiento activo (ítems 2 y 10)

Planificación (ítems 6 y 26)

Apoyo emocional (ítems 9 y 17)

Apoyo social (ítems 1 y 28)

Religión (ítems 16 y 20)

Reevaluación positiva (ítems 14 y 18)

Aceptación (ítems 3 y 21)

Negación (ítems 5 y 13)

Humor (ítems 7 y 19)

Autodistracción (ítems 4 y 22)

Autoinculpación (ítems 8 y 27)

Desconexión (ítems 11 y 25)

Desahogo (ítems 12 y 23)

Uso de sustancias (ítems 15 y 24)
